# Supplementary material for: Liposomal Iron Oxide Nanoparticles Loaded with Doxorubicin for Combined Chemo-Photothermal Cancer Therapy
Source: MDPI journal article supplement (doi:10.3390/pharmaceutics15010292), 2023-01-15
Supplement: s1 [file s1]

# Supplemental Material: Liposomal iron oxide nanoparticles loaded with doxorubicin for combined chemo-photothermal cancer therapy

Taehoon Park, Reejun Amayta, Kyoung Ah Min \* and Meong Cheol Shin \*

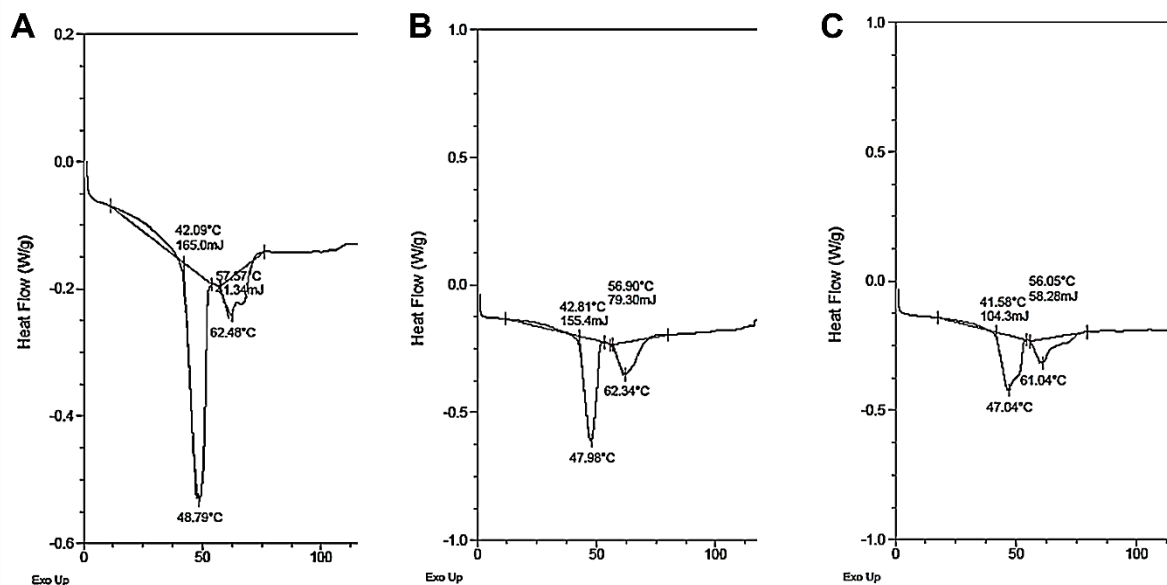

**Figure S1.** The differential scanning calorimetry (DSC) measurement results of Lipo-IONP synthesized with different lipid ratios; (A) L1, (B) L2, (C) L3. These Lipo-IONP formulations were prepared with the ratios of DPPC:DSPE-P2000 of 3:1, 4:1, or 5:1, respectively.
